# Supplementary material for: Morbidity from Malaria in Children in the Year after They Had Received Intermittent Preventive Treatment of Malaria: A Randomised Trial
Source: PubMed Central journal article supplement (PMC3155539; doi:10.1371/journal.pone.0023391), 2011-08-12
Supplement: pone.0023391.s004.pdf [file pone.0023391.s004.pdf]

**LONDON SCHOOL OF HYGIENE  
& TROPICAL MEDICINE**

**ETHICS COMMITTEE**

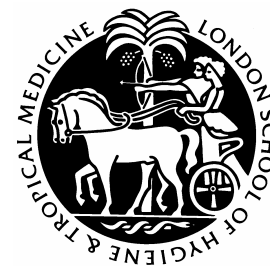

**APPROVAL FORM**

**Application number: 5275**

**Name of Principal Investigator Professor Brian Greenwood**

**Department Infectious and Tropical Diseases**

**Head of Department Professor Simon Croft**

**Title: A trial of the combined impact of intermittent preventive treatment and insecticide treated bednets on morbidity from malaria in African children.**

This application has been approved by the Committee.

**Chair** .....

*T. W. Meade*

**Professor Tom Meade**

**Date** .....19 March 2008.....

**Approval is dependent on local ethical approval having been received.**

**Any subsequent changes to the consent form must be re-submitted to the Committee.**
